# Supplementary material for: Extended-sampling QM/MM simulation of biochemical reactions involving P–N bonds
Source: Royal Society of Chemistry journal article supplement (doi:10.1039/d2cp05890a), 2023-01-01
Supplement: d2cp05890a2.pdf [file d2cp05890a2.pdf]

Supporting Information:  
Extended-sampling QM/MM simulation of  
biochemical reactions involving P–N bonds

Mayukh Kansari, Lena Eichinger, and Tomáš Kubarř\*

*Institute of Physical Chemistry, Karlsruhe Institute of Technology, 76131 Karlsruhe,  
Germany*

E-mail: tomas.kubar@kit.edu

Table S1: Cartesian coordinates ( $\text{\AA}$ ) of the molecules P-N-product and P-N-intermediate, as used to generate the repulsive potential with *erepfit*. The structures were obtained from energy minimizations on the level B3LYP/aug-cc-pVTZ in vacuo.

| <b>PN-product</b> |          |          |          | <b>PN-intermediate</b> |          |          |          |
|-------------------|----------|----------|----------|------------------------|----------|----------|----------|
|                   | <i>x</i> | <i>y</i> | <i>z</i> |                        | <i>x</i> | <i>y</i> | <i>z</i> |
| C                 | -1.0760  | 1.2296   | 0.0      | C                      | -2.7736  | 1.7845   | 0.0      |
| N                 | -0.2002  | 0.1559   | 0.0      | C                      | -1.4192  | 1.5932   | 0.0      |
| C                 | -0.9982  | -0.9869  | 0.0      | N                      | -1.2147  | 0.2152   | 0.0      |
| C                 | -2.2823  | -0.5390  | 0.0      | C                      | -2.4710  | -0.3281  | 0.0      |
| N                 | -2.3187  | 0.8430   | 0.0      | N                      | -3.4219  | 0.5781   | 0.0      |
| P                 | 1.4965   | 0.2653   | 0.0      | P                      | 0.4567   | -0.5869  | 0.0      |
| O                 | 1.9723   | -0.6759  | -1.1922  | O                      | -0.3169  | -1.9890  | 0.0      |
| O                 | 1.9196   | 1.6662   | 0.0      | O                      | 0.8191   | 0.1611   | 1.3790   |
| O                 | 1.9723   | -0.6759  | 1.1922   | O                      | 0.8191   | 0.1611   | -1.3790  |
| H                 | -0.7121  | 2.2442   | 0.0      | H                      | 0.0896   | 0.6936   | -1.7194  |
| H                 | -0.5751  | -1.9763  | 0.0      | H                      | 0.0896   | 0.6936   | 1.7194   |
| H                 | -3.1869  | -1.1254  | 0.0      | H                      | -2.6281  | -1.3922  | 0.0      |
| H                 | 1.9944   | -0.2124  | 2.0395   | H                      | -0.6037  | 2.2985   | 0.0      |
| H                 | 1.9944   | -0.2124  | -2.0395  | H                      | -3.3120  | 2.7190   | 0.0      |
|                   |          |          |          | O                      | 1.8977   | -1.3902  | 0.0      |
|                   |          |          |          | C                      | 3.1649   | -0.7384  | 0.0      |
|                   |          |          |          | H                      | 3.9201   | -1.5233  | 0.0      |
|                   |          |          |          | H                      | 3.2862   | -0.1220  | -0.8925  |
|                   |          |          |          | H                      | 3.2862   | -0.1220  | 0.8925   |
|                   |          |          |          | H                      | 0.3320   | -2.7058  | 0.0      |

Table S2: The length of the P–N bond (in  $\text{\AA}$ ) in phosphohistidine resulting from geometry optimization performed on various DFT levels, with aqueous environment represented with the polarizable continuum model (PCM). The molecule of phosphohistidine is protonated at the histidine moiety, with a completely deprotonated phosphate group, which is the state appearing as P in the PMF in Fig. 4 (main text).

| Basis set     | B3LYP | PBE  |
|---------------|-------|------|
| aug-cc-pVTZ   | 1.91  | 1.93 |
| SV            | 1.98  | 2.02 |
| Huzinaga-MINI | 2.13  | 2.23 |

Table S3: Cartesian coordinates ( $\text{\AA}$ ) of selected representative structures corresponding to the three significant states observed in the 2D QM/MM multiple walker metadynamics simulation of the analog of histidine phosphorylation performed with DFTB3/3OB-OPhyd-PNmod, leading to the PMF in Fig. 4C (main text).

| Reactant (R) |       |       |       | Product (P) |       |       |       | Transition State (TS) |       |       |       |
|--------------|-------|-------|-------|-------------|-------|-------|-------|-----------------------|-------|-------|-------|
| $x$          | $y$   | $z$   |       | $x$         | $y$   | $z$   |       | $x$                   | $y$   | $z$   |       |
| C            | 17.53 | 16.46 | 17.90 | C           | 18.46 | 18.02 | 15.89 | C                     | 17.27 | 18.25 | 15.05 |
| N            | 16.40 | 15.69 | 17.92 | N           | 18.42 | 17.46 | 17.18 | N                     | 17.64 | 17.29 | 15.98 |
| C            | 16.31 | 15.00 | 16.76 | C           | 17.57 | 16.39 | 17.13 | C                     | 16.70 | 16.32 | 15.87 |
| H            | 15.55 | 14.31 | 16.42 | H           | 17.32 | 15.74 | 17.91 | H                     | 16.67 | 15.39 | 16.50 |
| N            | 17.30 | 15.37 | 15.93 | N           | 17.11 | 16.31 | 15.86 | N                     | 15.72 | 16.58 | 15.05 |
| C            | 18.10 | 16.27 | 16.63 | C           | 17.63 | 17.27 | 15.07 | C                     | 16.09 | 17.78 | 14.44 |
| H            | 19.00 | 16.72 | 16.21 | H           | 17.42 | 17.32 | 14.04 | H                     | 15.45 | 18.25 | 13.66 |
| H            | 15.76 | 15.63 | 18.70 | H           | 19.01 | 17.77 | 17.88 | H                     | 18.36 | 17.42 | 16.64 |
| O            | 15.27 | 14.44 | 12.93 | O           | 14.81 | 15.52 | 16.27 | O                     | 13.17 | 15.74 | 15.90 |
| H            | 12.30 | 14.31 | 11.24 | H           | 11.78 | 11.29 | 12.09 | H                     | 11.65 | 10.98 | 14.16 |
| O            | 13.76 | 15.35 | 14.85 | O           | 16.60 | 13.75 | 15.59 | O                     | 14.94 | 13.90 | 15.44 |
| O            | 12.76 | 13.63 | 13.17 | O           | 12.80 | 11.96 | 13.84 | O                     | 12.01 | 13.01 | 14.57 |
| C            | 12.11 | 14.52 | 12.31 | C           | 11.72 | 11.74 | 13.09 | C                     | 12.21 | 11.72 | 14.82 |
| P            | 14.21 | 14.15 | 14.04 | P           | 15.96 | 15.10 | 15.32 | P                     | 14.07 | 15.02 | 14.88 |
| H            | 11.01 | 14.51 | 12.47 | H           | 11.00 | 11.04 | 13.50 | H                     | 13.33 | 11.46 | 14.97 |
| H            | 12.42 | 15.54 | 12.56 | H           | 11.11 | 12.65 | 12.83 | H                     | 11.69 | 11.44 | 15.84 |
| O            | 14.66 | 12.89 | 14.85 | O           | 15.70 | 15.55 | 13.87 | O                     | 13.91 | 15.26 | 13.36 |
| H            | 17.65 | 17.11 | 18.76 | H           | 18.96 | 18.97 | 15.61 | H                     | 17.93 | 19.02 | 14.82 |

Table S4: Cartesian coordinates (Å) of the states R, TS and P1 observed in the first step of the hydrolysis of TEPA, after energy minimization performed on the level B3LYP/aug-cc-pVTZ.

| <b>TEPA-R</b> |          |          |          | <b>TEPA-TS</b> |          |          |          | <b>TEPA-P1</b> |          |          |          |
|---------------|----------|----------|----------|----------------|----------|----------|----------|----------------|----------|----------|----------|
|               | <i>x</i> | <i>y</i> | <i>z</i> |                | <i>x</i> | <i>y</i> | <i>z</i> |                | <i>x</i> | <i>y</i> | <i>z</i> |
| O             | 12.5020  | 14.5650  | 13.1404  | O              | -1.3109  | 1.5157   | -1.02508 | O              | 12.2151  | 14.6929  | 13.3389  |
| P             | 13.3396  | 13.5874  | 13.8706  | P              | 0.0270   | 1.0092   | -0.70064 | P              | 13.6354  | 14.3833  | 13.5473  |
| N             | 12.0808  | 12.4495  | 14.5743  | N              | -1.3326  | -0.8311  | 0.50702  | N              | 12.1757  | 12.3358  | 15.1707  |
| C             | 12.3541  | 11.0976  | 15.1531  | C              | -1.4679  | -2.2497  | 0.91936  | C              | 11.7900  | 10.9248  | 15.4099  |
| C             | 11.8735  | 12.1699  | 16.0351  | C              | -1.8623  | -1.1782  | 1.85073  | C              | 11.7622  | 11.8905  | 16.5224  |
| N             | 14.1560  | 13.9844  | 15.2451  | N              | 0.9050   | 1.4605   | 0.59287  | N              | 14.4724  | 14.8294  | 14.8711  |
| C             | 14.1294  | 15.3387  | 15.8480  | C              | 0.4221   | 1.7370   | 1.95136  | C              | 13.9528  | 15.0282  | 16.2332  |
| C             | 15.3912  | 14.8053  | 15.2977  | C              | 1.4107   | 0.6581   | 1.71502  | C              | 14.9900  | 14.0030  | 15.9763  |
| N             | 14.2848  | 12.4817  | 13.0882  | N              | 0.8992   | 0.0011   | -1.61651 | N              | 14.5255  | 13.3051  | 12.7134  |
| C             | 14.1538  | 12.2379  | 11.6297  | C              | 1.2339   | -1.4250  | -1.55163 | C              | 14.6107  | 11.8384  | 12.8682  |
| C             | 15.3809  | 12.8637  | 12.1561  | C              | 0.4444   | -0.8883  | -2.68820 | C              | 14.0126  | 12.4218  | 11.6475  |
| H             | 11.6758  | 10.3249  | 14.8228  | H              | -2.2380  | -2.8344  | 0.43605  | H              | 10.8505  | 10.5859  | 14.9958  |
| H             | 13.4044  | 10.8480  | 15.1559  | H              | -0.5365  | -2.7721  | 1.08983  | H              | 12.5995  | 10.2096  | 15.3496  |
| H             | 10.8386  | 12.1916  | 16.3435  | H              | -2.9141  | -0.9959  | 2.02072  | H              | 10.8021  | 12.2275  | 16.8882  |
| H             | 12.5854  | 12.6765  | 16.6672  | H              | -1.2170  | -0.9401  | 2.68401  | H              | 12.5509  | 11.8701  | 17.2626  |
| H             | 13.9677  | 15.3395  | 16.9172  | H              | -0.5982  | 1.4624   | 2.17630  | H              | 12.9445  | 14.6903  | 16.4226  |
| H             | 13.6247  | 16.1139  | 15.2876  | H              | 0.7550   | 2.6849   | 2.35076  | H              | 14.2324  | 15.9737  | 16.6765  |
| H             | 16.1418  | 14.4063  | 15.9652  | H              | 1.0693   | -0.3650  | 1.77803  | H              | 14.6782  | 12.9690  | 15.9911  |
| H             | 15.7403  | 15.2336  | 14.3688  | H              | 2.4547   | 0.8244   | 1.94165  | H              | 16.0217  | 14.2045  | 16.2286  |
| H             | 13.4628  | 12.8662  | 11.0828  | H              | 0.7158   | -2.0172  | -0.81239 | H              | 13.9487  | 11.3862  | 13.5913  |
| H             | 14.1583  | 11.1903  | 11.3634  | H              | 2.2857   | -1.6367  | -1.68582 | H              | 15.6242  | 11.4633  | 12.8353  |
| H             | 15.5280  | 13.9191  | 11.9674  | H              | -0.6131  | -1.1130  | -2.73035 | H              | 12.9386  | 12.3671  | 11.5278  |
| H             | 16.2717  | 12.2650  | 12.2838  | H              | 0.9281   | -0.7155  | -3.64000 | H              | 14.5901  | 12.4617  | 10.7345  |
| O             | 14.7619  | 16.1636  | 12.3328  | O              | 0.8609   | 2.6845   | -1.88690 | O              | 14.2862  | 15.8786  | 12.4214  |
| H             | 13.8007  | 16.0732  | 12.2822  | H              | 0.1545   | 3.3268   | -2.03970 | H              | 13.5834  | 16.5387  | 12.3090  |
| H             | 14.9905  | 16.9588  | 11.8412  | H              | 1.6298   | 3.1582   | -1.54477 | H              | 15.1039  | 16.3116  | 12.7109  |
| H             | 11.2177  | 12.5306  | 14.0442  | H              | -2.1054  | -0.5606  | -0.09169 | H              | 11.4131  | 12.8332  | 14.7235  |

Table S5: Cartesian coordinates ( $\text{\AA}$ ) of the states R and P1 observed in the first step of the hydrolysis of TEPA, after energy minimization performed with DFTB3/3OB-OPhyd-PNmod. (Energy minimization of state TS was not performed.)

| <b>TEPA-R</b> |          |          |          | <b>TEPA-P1</b> |          |          |          |
|---------------|----------|----------|----------|----------------|----------|----------|----------|
|               | <i>x</i> | <i>y</i> | <i>z</i> |                | <i>x</i> | <i>y</i> | <i>z</i> |
| O             | 12.2937  | 14.5736  | 13.1267  | O              | 0.1440   | 1.6877   | -1.3743  |
| P             | 13.2403  | 13.6703  | 13.8135  | P              | 0.0917   | 0.4353   | -0.6244  |
| N             | 12.0424  | 12.3919  | 14.5990  | N              | -1.1872  | -0.5299  | -0.5749  |
| C             | 12.4545  | 11.0978  | 15.1638  | C              | -2.6242  | -0.3120  | -0.3878  |
| C             | 11.9051  | 12.1534  | 16.0444  | C              | -1.8987  | -1.3143  | 0.4378   |
| N             | 14.0413  | 14.0871  | 15.2136  | N              | 1.3838   | -0.2444  | 0.0437   |
| C             | 14.1782  | 15.4797  | 15.7055  | C              | 2.0172   | -1.5526  | 0.1912   |
| C             | 15.3806  | 14.7214  | 15.2974  | C              | 2.8101   | -0.3669  | -0.2440  |
| N             | 14.1926  | 12.5445  | 13.0238  | H              | -3.2455  | -0.6494  | -1.2169  |
| C             | 14.1494  | 12.3475  | 11.5527  | H              | -2.9124  | 0.6395   | 0.0618   |
| C             | 15.3736  | 12.8839  | 12.1847  | H              | -1.9983  | -2.3750  | 0.2056   |
| H             | 11.8307  | 10.2529  | 14.8802  | H              | -1.6650  | -1.0798  | 1.4779   |
| H             | 13.5283  | 10.9232  | 15.1489  | H              | 1.7395   | -2.3112  | -0.5405  |
| H             | 10.8796  | 12.0791  | 16.3995  | H              | 2.1049   | -1.9055  | 1.2205   |
| H             | 12.5881  | 12.7352  | 16.6609  | H              | 3.1032   | -0.2735  | -1.2908  |
| H             | 13.9496  | 15.6020  | 16.7644  | H              | 3.4665   | 0.1302   | 0.4718   |
| H             | 13.8017  | 16.2616  | 15.0473  | O              | -0.5541  | 1.6122   | 1.5631   |
| H             | 16.0261  | 14.2838  | 16.0594  | H              | -0.8366  | 2.5224   | 1.4189   |
| H             | 15.8626  | 14.9708  | 14.3533  | H              | -0.0877  | 1.5531   | 2.4038   |
| H             | 13.5047  | 13.0231  | 10.9908  | H              | 2.0104   | -2.5907  | -3.8011  |
| H             | 14.1137  | 11.3021  | 11.2468  | N              | 0.4001   | -1.1881  | -4.1958  |
| H             | 15.6030  | 13.9435  | 12.0729  | C              | 1.7878   | -1.6655  | -4.3370  |
| H             | 16.2258  | 12.2239  | 12.3464  | H              | 0.4312   | -2.6337  | -5.8218  |
| O             | 14.6240  | 15.9701  | 12.5238  | H              | 0.3704   | -0.1695  | -4.2068  |
| H             | 13.7045  | 16.1152  | 12.2695  | C              | 0.8699   | -1.6918  | -5.5064  |
| H             | 15.1728  | 16.6822  | 12.1809  | H              | 2.5773   | -0.9157  | -4.3031  |
| H             | 11.1498  | 12.3626  | 14.0943  | H              | 1.0180   | -0.9604  | -6.2955  |

Table S6: Cartesian coordinates (Å) of selected representative structures corresponding to the four significant states observed in the 2D QM/MM multiple walker metadynamics simulation of the two-step hydrolysis of TEPA performed with DFTB3/3OB-OPhyd-PNmod, leading to the PMF in Fig. 7 (main text).

| <b>TEPA-R</b> |          |          |       | <b>TEPA-P1</b> |          |          |       | <b>TEPA-I</b> |          |          |       | <b>TEPA-P2</b> |          |          |       |
|---------------|----------|----------|-------|----------------|----------|----------|-------|---------------|----------|----------|-------|----------------|----------|----------|-------|
| <i>x</i>      | <i>y</i> | <i>z</i> |       | <i>x</i>       | <i>y</i> | <i>z</i> |       | <i>x</i>      | <i>y</i> | <i>z</i> |       | <i>x</i>       | <i>y</i> | <i>z</i> |       |
| O             | 14.27    | 15.91    | 11.67 | O              | 14.45    | 15.69    | 11.65 | O             | 15.88    | 14.03    | 15.39 | O              | 16.23    | 15.83    | 14.61 |
| P             | 14.97    | 15.81    | 13.03 | P              | 14.97    | 15.05    | 12.84 | P             | 15.45    | 14.50    | 14.01 | P              | 15.67    | 14.62    | 13.93 |
| N             | 15.07    | 17.55    | 13.58 | N              | 15.35    | 17.86    | 13.42 | N             | 14.69    | 18.01    | 12.87 | N              | 15.64    | 18.25    | 11.66 |
| C             | 16.25    | 18.45    | 13.40 | C              | 16.00    | 18.97    | 12.84 | C             | 15.40    | 18.63    | 11.80 | C              | 15.65    | 19.46    | 12.54 |
| C             | 14.99    | 18.63    | 12.65 | C              | 14.47    | 18.84    | 12.94 | C             | 14.57    | 17.46    | 11.42 | C              | 15.11    | 18.17    | 13.02 |
| N             | 14.00    | 15.23    | 14.32 | N              | 14.02    | 15.15    | 14.19 | N             | 13.88    | 15.04    | 13.69 | N              | 14.19    | 14.21    | 14.68 |
| C             | 13.98    | 13.96    | 15.07 | C              | 13.82    | 14.31    | 15.35 | C             | 13.21    | 15.88    | 14.69 | C              | 12.90    | 15.01    | 14.65 |
| C             | 12.85    | 14.40    | 14.24 | C              | 12.67    | 14.53    | 14.38 | C             | 12.76    | 14.50    | 14.50 | C              | 12.99    | 13.62    | 14.16 |
| N             | 16.58    | 15.35    | 13.09 | N              | 16.58    | 14.88    | 13.11 | N             | 15.91    | 13.67    | 12.70 | N              | 15.28    | 14.93    | 12.39 |
| C             | 17.07    | 14.04    | 13.35 | C              | 17.39    | 13.93    | 13.84 | C             | 17.12    | 13.43    | 11.97 | C              | 16.10    | 14.38    | 11.09 |
| C             | 17.17    | 14.59    | 12.01 | C              | 17.53    | 14.11    | 12.35 | C             | 15.94    | 13.88    | 11.25 | C              | 14.79    | 13.79    | 11.54 |
| H             | 17.08    | 17.92    | 12.92 | H              | 16.54    | 18.73    | 11.93 | H             | 16.53    | 18.48    | 11.71 | H              | 14.96    | 20.20    | 12.08 |
| H             | 16.54    | 18.94    | 14.26 | H              | 16.58    | 19.73    | 13.51 | H             | 15.06    | 19.64    | 11.38 | H              | 16.65    | 19.75    | 12.79 |
| H             | 14.95    | 18.34    | 11.62 | H              | 13.79    | 18.60    | 12.07 | H             | 15.05    | 16.50    | 11.15 | H              | 14.11    | 17.82    | 13.28 |
| H             | 14.29    | 19.43    | 12.99 | H              | 14.02    | 19.50    | 13.70 | H             | 13.57    | 17.58    | 11.02 | H              | 15.79    | 17.51    | 13.58 |
| H             | 14.00    | 14.01    | 16.20 | H              | 13.69    | 14.82    | 16.33 | H             | 12.56    | 16.69    | 14.27 | H              | 12.87    | 15.88    | 14.02 |
| H             | 14.61    | 13.22    | 14.74 | H              | 14.38    | 13.34    | 15.32 | H             | 13.69    | 16.14    | 15.64 | H              | 12.44    | 15.21    | 15.62 |
| H             | 12.06    | 14.88    | 14.75 | H              | 11.99    | 15.40    | 14.67 | H             | 11.86    | 14.34    | 13.99 | H              | 12.94    | 13.32    | 13.06 |
| H             | 12.57    | 14.05    | 13.26 | H              | 12.30    | 13.83    | 13.65 | H             | 13.10    | 13.70    | 15.18 | H              | 12.67    | 12.80    | 14.77 |
| H             | 16.33    | 13.23    | 13.53 | H              | 16.81    | 13.03    | 14.12 | H             | 17.48    | 12.47    | 11.85 | H              | 17.09    | 14.00    | 11.33 |
| H             | 17.85    | 13.90    | 14.08 | H              | 18.15    | 14.38    | 14.50 | H             | 17.87    | 14.24    | 12.09 | H              | 16.10    | 15.14    | 10.33 |
| H             | 16.46    | 14.04    | 11.29 | H              | 16.98    | 13.43    | 11.65 | H             | 15.33    | 13.09    | 10.78 | H              | 14.73    | 12.74    | 12.01 |
| H             | 18.08    | 14.99    | 11.54 | H              | 18.28    | 14.65    | 11.91 | H             | 15.80    | 14.92    | 10.94 | H              | 13.85    | 14.12    | 11.15 |
| O             | 14.66    | 12.25    | 12.47 | O              | 14.56    | 12.73    | 12.10 | O             | 16.34    | 16.11    | 13.76 | O              | 16.48    | 13.26    | 14.03 |
| H             | 14.38    | 11.91    | 11.61 | H              | 15.24    | 12.35    | 11.59 | H             | 17.24    | 16.35    | 14.09 | H              | 16.65    | 12.58    | 14.73 |
| H             | 14.85    | 11.63    | 13.20 | H              | 14.02    | 11.99    | 12.45 | H             | 15.73    | 17.03    | 13.69 | H              | 15.09    | 18.36    | 11.14 |
| H             | 14.52    | 17.66    | 14.51 | H              | 15.47    | 17.79    | 14.38 | H             | 13.82    | 18.41    | 13.10 | H              | 16.51    | 17.74    | 11.46 |
